# Supplementary material for: The alteration of urinary metabolomics profiles in Kashin–Beck disease in a three consecutive year study
Source: Royal Society of Chemistry journal article supplement (doi:10.1039/d2mo00297c), 2022-12-12
Supplement: d2mo00297c1.pdf [file d2mo00297c1.pdf]

Please use files  
tab to view ESI  
tables.
