# Supplementary material for: The alteration of urinary metabolomics profiles in Kashin–Beck disease in a three consecutive year study
Source: Royal Society of Chemistry journal article supplement (doi:10.1039/d2mo00297c), 2022-12-12

2017

pos-adult

Total Ion Chromatograms

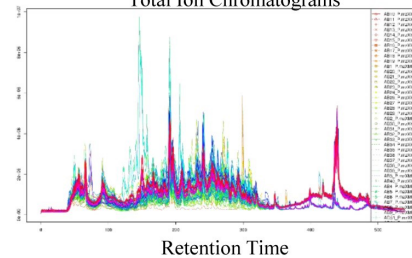

neg-adult

Total Ion Chromatograms

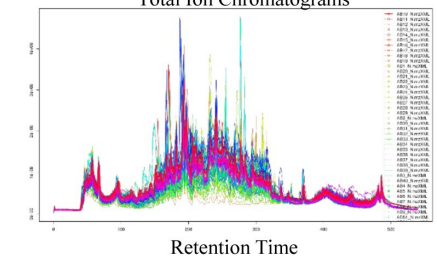

pos-child

Total Ion Chromatograms

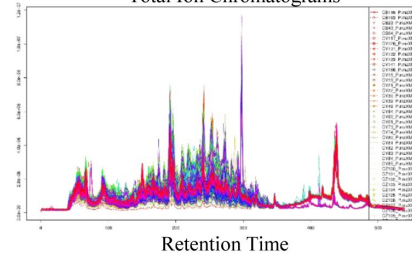

neg-child

Total Ion Chromatograms

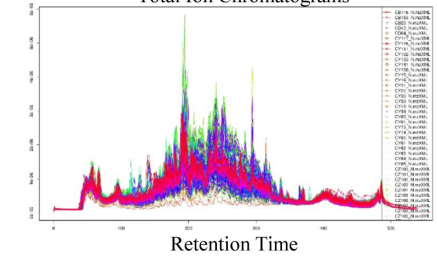

2018

pos-child

Total Ion Chromatograms

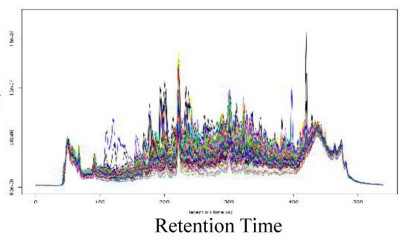

neg-child

Total Ion Chromatograms

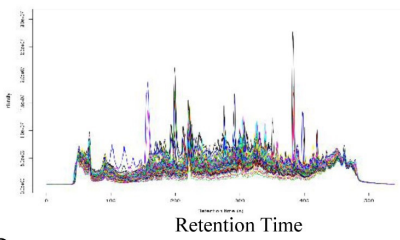

2019

pos-child

Total Ion Chromatograms

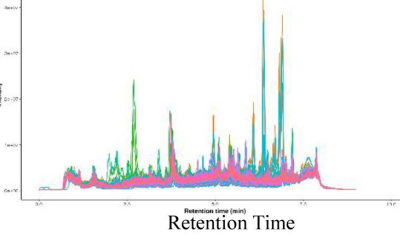

neg-child

Total Ion Chromatograms

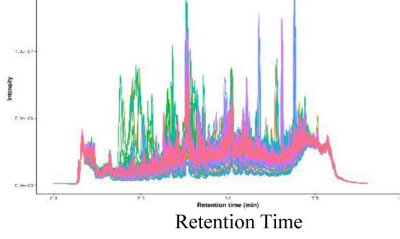

Supplement: d2mo00297c2.pdf [file d2mo00297c2.pdf]
